# Supplementary material for: A multiplexed FRET aptasensor for the simultaneous detection of mycotoxins with magnetically controlled graphene oxide/Fe3O4 as a single energy acceptor
Source: Royal Society of Chemistry journal article supplement (doi:10.1039/c9an01593k), 2019-01-01
Supplement: c9an01593k1.pdf [file c9an01593k1.pdf]

## Electronic Supplementary Information

### **A multiplexed FRET aptasensor for simultaneous detection of mycotoxins with magnetically controlled graphene oxide/Fe<sub>3</sub>O<sub>4</sub> as single energy acceptor**

Chengquan Wang,<sup>\*a</sup> Xingyi Huang,<sup>\*a</sup> Xiaoyu Tian,<sup>a</sup> Xiaorui Zhang,<sup>a</sup> Shanshan Yu,<sup>a</sup> Xianhui Chang,<sup>a</sup> Yi Ren,<sup>a</sup> and Jing Qian,<sup>\*b</sup>

<sup>a</sup> School of Food and Biological Engineering, Jiangsu University, Zhenjiang 212013, PR China.

<sup>b</sup> School of Chemistry and Chemical Engineering, Jiangsu University, Zhenjiang 212013, PR China.

\* Corresponding author: Tel.: +86 511 88791800. Fax: +86 511 88791708.

E-mail addresses: wangcq@ujs.edu.cn (C.Q. Wang); h\_xingyi@163.com (X. Y. Huang); qianj@ujs.edu.cn (J. Qian)

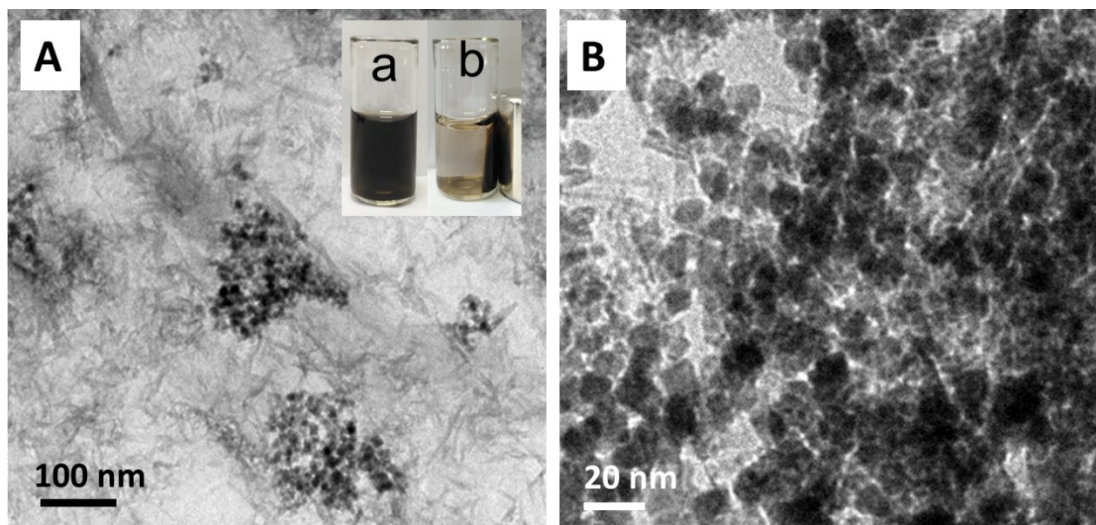

**Fig. S1** TEM images of the pristine GO/Fe<sub>3</sub>O<sub>4</sub> (A and B). Insets are the photos of GO/Fe<sub>3</sub>O<sub>4</sub> before (a) and after (b) using a magnet.

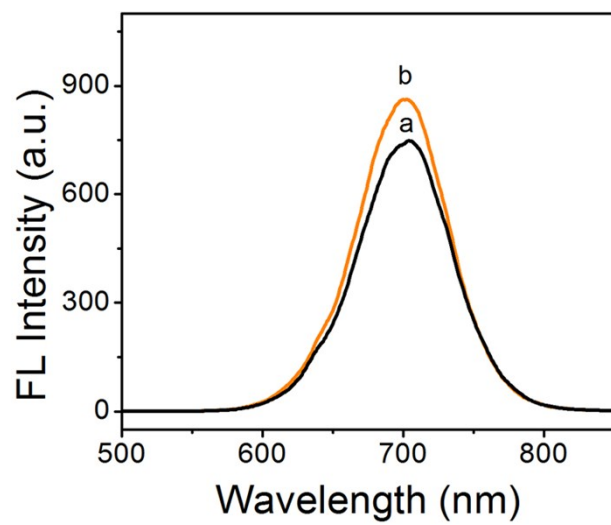

**Fig. S2** After incubation with the FB1 ( $300 \text{ ng mL}^{-1}$ ), the fluorescence intensity of the RQDs before (a) and after (b) removal of GO/Fe<sub>3</sub>O<sub>4</sub> by magnetic separation.
